# Supplementary material for: Liposomal Formulation of Botanical Extracts may Enhance Yield Triggering PR Genes and Phenylpropanoid Pathway in Barley (Hordeum vulgare)
Source: MDPI journal article supplement (doi:10.3390/plants11212969), 2022-11-03
Supplement: s1 [file s1]

## Supplemental Materials

**Supplemental Table S1.** Characteristics of field experiments of *Hordeum vulgare* test crop.

|                              |                                                            |
|------------------------------|------------------------------------------------------------|
| Examined culture             |                                                            |
| Species name (English/Latin) | winter barley / <i>Hordeum vulgare</i>                     |
| Breed                        | SU Ellen                                                   |
| Sowing time                  | 13.10.2020.                                                |
| Number of plants             | 4.5 million germs / ha                                     |
| Row spacing                  | 12 cm                                                      |
| Planting distance:           | 1.2 cm                                                     |
| Other stock characteristics  | homogeneous stock                                          |
| Harvest time                 | 12/07/2021                                                 |
| Experimental site            |                                                            |
| County, locality, factory:   | Komárom-Esztergom County, Tata, Hungary, EOY 592699 255447 |
| Elevation                    | 144 m                                                      |
| Soil physical variety        | Sandy loam                                                 |
| pH (KCl)                     | 7.4                                                        |
| Commitment (CA)              | 34                                                         |
| Humus content (%)            | 1.77                                                       |
| CaCO <sub>3</sub> (w / w%)   | 11                                                         |
| CEC                          | 18.5                                                       |
| Pre-crop                     | spring barley                                              |
| Plot size                    | 75 m <sup>2</sup>                                          |
| Number of repetitions        | 4                                                          |

**Supplemental Table S2.** Technical data of treatment of Elice16Indures in field experiments.

| Treatment                  | A                     | B                     |
|----------------------------|-----------------------|-----------------------|
| Treatment time             | 05/05/2021            | 17/05/2021            |
| Crop Phenology             | BBCH 39               | BBCH 51               |
| Meteorological conditions  |                       |                       |
| air temperature, ° C       | 17.2 ° C              | 23.3 ° C              |
| rel. humidity, %           | 63.40%                | 74.50%                |
| cloud cover, %             | 25%                   | 75%                   |
| Application technical data |                       |                       |
| Spraying                   | TTAM4E spraying drone | TTAM4E spraying drone |
| Spray juice (l / ha)       | 50 l / ha             | 50 l / ha             |
| Spraying method            | stock spraying        | stock spraying        |
| Dosage                     | 10-240g/ha            | 10-240g/ha            |

**Supplemental Table S3.** Determination of crop yield calculating statistical data of four parallel parcels (kg plots<sup>-1</sup>).

| Treatment      | Dose g*ha-1        | Yield kg/plots (1.10*8) |             |             |             |             |             |
|----------------|--------------------|-------------------------|-------------|-------------|-------------|-------------|-------------|
|                |                    | I                       | II          | III         | IV          | average     | control %   |
| control        | control            | 4,4                     | 4,8         | 5,1         | 4,8         | 4,775       | 100         |
| Fitokondi      | Fitokondi(4l*ha-1) | 5,2                     | 5,2         | 4,1         | 6,1         | 5,15        | 107,9       |
| Elice16Indures | 10                 | 6,9                     | 6,9         | 5,3         | 5,2         | 6,075       | 127,2       |
| Elice16Indures | 20                 | 5,6                     | 4,6         | 4,5         | 6,5         | 5,3         | 111         |
| Elice16Indures | 30                 | 4,3                     | 4,2         | 6,2         | 6,2         | 5,225       | 109,4       |
| Elice16Indures | 60                 | 5,3                     | 5,8         | 6,5         | 4,9         | 5,625       | 117,8       |
| Elice16Indures | 120                | 4,8                     | 5,7         | 4,4         | 6,4         | 5,325       | 111,5       |
| Elice16Indures | 240                | 6,8                     | 6,8         | 6,8         | 6,2         | 6,65        | 139,3       |
| SzD10%         |                    |                         |             |             |             | 0,975       | 20,4        |
| SzD5%          |                    |                         |             |             |             | 1,176       | 24,6        |
| SzD1%          |                    |                         |             |             |             | 1,593       | 33,4        |
|                |                    |                         |             |             |             |             |             |
|                |                    |                         |             |             |             |             |             |
| variancia      |                    |                         |             |             |             |             |             |
| G=             | 176,5              |                         |             |             |             |             |             |
| C=             | 973,5078125        |                         |             |             |             |             |             |
|                |                    |                         |             |             |             |             |             |
|                |                    |                         |             |             |             |             |             |
|                | SQ                 | FG                      | MSQ         | Fsz         | Ftábl.      | T-ért.      | SzD         |
| All            | 25,4221875         |                         |             |             |             |             |             |
| Repeat         | 0                  | 0                       |             |             | 1,98262518  | 1,71088208  | 0,974649218 |
| Treatment      | 9,8446875          | 7                       | 1,406383929 | 2,166792764 | 2,422628533 | 2,063898562 | 1,175754392 |
| Error          | 15,5775            | 24                      | 0,6490625   |             | 3,49592752  | 2,796939505 | 1,593350549 |
|                |                    |                         |             |             |             |             |             |

**Supplemental Table S4.** Determination of moisture calculating statistical data of four parallel parcels (%).

| Treatment      | Dose g*ha-1        | Moisture% |             |             |             |             |             |
|----------------|--------------------|-----------|-------------|-------------|-------------|-------------|-------------|
|                |                    | I         | II          | III         | IV          | average     | control %   |
| control        | control            | 8,82      | 9,08        | 9,03        | 8,01        | 8,735       | 100         |
| Fitokondi      | Fitokondi, 4l*ha-1 | 9,06      | 8,02        | 9,09        | 9,04        | 8,803       | 100,8       |
| Elice16Indures | 10                 | 8,09      | 9,05        | 8,07        | 9,06        | 8,568       | 98,1        |
| Elice16Indures | 20                 | 8,06      | 9,06        | 8,09        | 8,06        | 8,318       | 95,2        |
| Elice16Indures | 30                 | 8,02      | 9,01        | 8,02        | 9,04        | 8,523       | 97,6        |
| Elice16Indures | 60                 | 8,03      | 9,04        | 9,01        | 8,07        | 8,538       | 97,7        |
| Elice16Indures | 120                | 8,01      | 8,02        | 9,04        | 8,09        | 8,29        | 94,9        |
| Elice16Indures | 240                | 9,06      | 8,07        | 8,03        | 8,02        | 8,295       | 95          |
| SzD10%         |                    |           |             |             |             | 0,641       | 7,3         |
| SzD5%          |                    |           |             |             |             | 0,773       | 8,9         |
| SzD1%          |                    |           |             |             |             | 1,048       | 12          |
|                |                    |           |             |             |             |             |             |
|                |                    |           |             |             |             |             |             |
| variancia      |                    |           |             |             |             |             |             |
| G=             | 272,27             |           |             |             |             |             |             |
| C=             | 2316,592278        |           |             |             |             |             |             |
|                |                    |           |             |             |             |             |             |
|                |                    |           |             |             |             |             |             |
|                | SQ                 | FG        | MSQ         | Fsz         | Ftábl.      | T-ért.      | SzD         |
| All            | 7,829221875        |           |             |             |             |             |             |
| Repeat         | 0                  | 0         |             |             | 1,98262518  | 1,71088208  | 0,641151728 |
| Treatment      | 1,088246875        | 7         | 0,155463839 |             | 2,422628533 | 2,063898562 | 0,77344438  |
| Error          | 6,740975           | 24        | 0,280873958 | 0,553500368 | 3,49592752  | 2,796939505 | 1,048150903 |
|                |                    |           |             |             |             |             |             |

**Supplemental Table S5.** Determination of crop yield at 8% moisture content, calculating statistical data of four parallel parcels (T ha<sup>-1</sup>).

| Treatment       | Dose g*ha-1         | Yield t*ha-1 (at 8% moisture content) |             |             |             |             |             |
|-----------------|---------------------|---------------------------------------|-------------|-------------|-------------|-------------|-------------|
|                 |                     | I                                     | II          | III         | IV          | average     | control %   |
| control+I2B4:H8 | control             | 3,96                                  | 4,31        | 4,58        | 4,36        | 4,306       | 100         |
| Fitokondi       | Fitokondi (4l*ha-1) | 4,67                                  | 4,73        | 3,68        | 5,48        | 4,641       | 107,8       |
| Elice16Indures  | 10                  | 6,27                                  | 6,2         | 4,81        | 4,67        | 5,489       | 127,5       |
| Elice16Indures  | 20                  | 5,09                                  | 4,13        | 4,09        | 5,91        | 4,803       | 111,5       |
| Elice16Indures  | 30                  | 3,91                                  | 3,78        | 5,64        | 5,57        | 4,723       | 109,7       |
| Elice16Indures  | 60                  | 4,82                                  | 5,21        | 5,84        | 4,45        | 5,081       | 118         |
| Elice16Indures  | 120                 | 4,36                                  | 5,18        | 3,95        | 5,81        | 4,828       | 112,1       |
| Elice16Indures  | 240                 | 6,11                                  | 6,18        | 6,18        | 5,64        | 6,026       | 139,9       |
| SzD10%          |                     |                                       |             |             |             | 0,883       | 20,5        |
| SzD5%           |                     |                                       |             |             |             | 1,065       | 24,7        |
| SzD1%           |                     |                                       |             |             |             | 1,443       | 33,5        |
|                 |                     |                                       |             |             |             |             |             |
| variancia       |                     |                                       |             |             |             |             |             |
| G=              | 159,5889032         |                                       |             |             |             |             |             |
| C=              | 795,8943129         |                                       |             |             |             |             |             |
|                 |                     |                                       |             |             |             |             |             |
|                 |                     |                                       |             |             |             |             |             |
|                 | SQ                  | FG                                    | MSQ         | Fsz         | Ftábl.      | T-ért.      | SzD         |
| All             | 20,98641922         |                                       |             |             |             |             |             |
| Repeat          | 0                   | 0                                     |             |             | 1,98262518  | 1,71088208  | 0,8828338   |
| Treatment       | 8,20559131          | 7                                     | 1,17222733  | 2,201223279 | 2,422628533 | 2,063898562 | 1,064994153 |
| Error           | 12,78082791         | 24                                    | 0,532534496 |             | 3,49592752  | 2,796939505 | 1,443251269 |

**Supplemental Table S6.** The active compounds of botanical extracts used to produce ELICE16INDURES.

| Latin binomial name          | Plant part    | Main active compounds                                                                                                             |
|------------------------------|---------------|-----------------------------------------------------------------------------------------------------------------------------------|
| <i>Urtica dioica</i>         | leaves        | phenolic ingredients, caffeic acid, malic acid                                                                                    |
| <i>Melissa officinalis</i>   | leaves        | citral, caryophyllene, citronellal, geranyl acetate, caryophyllene oxide                                                          |
| <i>Carum carvi</i>           | seeds         | carvone, limonene                                                                                                                 |
| <i>Cinnamon Ceylanicum</i>   | bark          | cinnamaldehyde, o-methoxy cinnamaldehyde, coumarin                                                                                |
| <i>Syzygium aromaticum</i>   | flower bud    | eugenol, caryophyllene, eugenyl acetate                                                                                           |
| <i>Allium sativum</i>        | garlic cloves | diallyl disulfide, diallyl trisulfide, methyl allyl disulfide, vinylidithiine, ajoene, allicin                                    |
| <i>Zingiber officinalis</i>  | rhizome       | zingiberene, farnesene, curcumene                                                                                                 |
| <i>Calendula officinalis</i> | flower        | pentacyclic triterpene alcohols and triterpendiol monoesters, faradiol esters esterified with mainly myristic- and palmitic acids |
| <i>Origanum majorana</i>     | leaves        | bicyclic monoterpenes cis- and trans-sabinene hydrate                                                                             |
| <i>Salvia officinalis</i>    | leaves        | alpha and beta thujone, camphor, cineole                                                                                          |
| <i>Thymus vulgaris</i>       | leaves        | thymol, p-cymol                                                                                                                   |
